# Supplementary material for: Two years of volatile organic compound online in situ measurements at the Site Instrumental de Recherche par Télédétection Atmosphérique (Paris region, France) using proton-transfer-reaction mass spectrometry
Source: Copernicus journal article supplement (doi:10.5194/essd-15-1947-2023), 2023-05-15
Supplement: Supplementary file 1 [file essd-15-1947-2023-supplement.pdf]

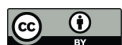

*Supplement of*

**Two years of volatile organic compound online in situ measurements at the Site Instrumental de Recherche par Télédétection Atmosphérique (Paris region, France) using proton-transfer-reaction mass spectrometry**

**Leïla Simon et al.**

*Correspondence to:* Valérie Gros ([valerie.gros@lscce.ipsl.fr](mailto:valerie.gros@lscce.ipsl.fr))

The copyright of individual parts of the supplement might differ from the article licence.

## Section 1: Supplementary text to the Instrumentation

### Text S1: Kinetic approach for volume mixing ratio calculation using instrumental transmission

To obtain the sensitivity (in ncps/ppb) of compounds not present in the calibration standard, first the transmission of compounds present in the standard is calculated, based on the instrument's parameters and following Equation S1 (Taipale et al., 2008):

$$\frac{T_{RH^+}}{T_{H_3O^+}} = 10^9 \frac{p_{drift}}{I_{norm} p_{norm}} \frac{\mu_0 N_0}{kL} \frac{E}{N^2} S_{norm} \quad (S1)$$

With  $p_{drift}$  being the drift pressure,  $I_{norm}$  the normalized intensity (equal to  $10^6$ ),  $p_{norm}$  the normal pressure,  $\mu_0$  being the reduced ion mobility of the primary ions and equal to  $2.8 \text{ cm}^2 \cdot \text{V}^{-1} \cdot \text{s}^{-1}$ ,  $N_0$  the number density of air at standard conditions,  $k$  being the reaction rate constant of the given compound,  $L$  the length of the drift tube,  $E = U_{drift}/L$ ,  $N = N_A p_{drift}/(RT_{drift})$ , and  $S_{norm}$  the normalized sensitivity obtained by a standard calibration. The  $k$  rates used in this study are summarized in Table 1; for unknown compounds or rates, a value of  $3 \cdot 10^{-9} \cdot \text{cm}^3 \cdot \text{s}^{-1} \cdot \text{molecule}^{-1}$  is used, as usually recommended, because most proton transfer reaction constants range  $2\text{-}4 \cdot 10^{-9} \cdot \text{cm}^3 \cdot \text{s}^{-1} \cdot \text{molecule}^{-1}$  (ACTRIS guidelines, Holzinger, 2015).

From the transmission coefficients of calibrated  $m/z$ , a transmission curve is modelled, from which the transmission coefficients of the other  $m/z$  are extracted and used to retrieve the sensitivity ( $S_{norm}$ ) using a reversed equation of (S1).

15

### Text S2: Discussion for tentative attribution of the measured $m/z$ , based on PTR-ToF-MS measurements and the literature

$m/z$  31 was assigned to  $\text{CH}_2\text{O}$  (formaldehyde), which cannot be precisely quantified by PTR-MS, due to its proton affinity being too close to that of water, and is thus defined as its proxy.  $m/z$  33 was assigned to  $\text{CH}_3\text{OH}$  (methanol), the main alcohol present in the atmosphere, and is also the most important oxygenated VOC; although at this mass there are interferences from  $\text{O}_2^+$ , thus resulting in a high background. At  $m/z$  42,  $\text{CH}_3\text{CN}$  (acetonitrile) is the main compound measured; interferences from other compounds are negligible (Yuan et al., 2017b). Acetaldehyde is the main component detected at  $m/z$  45 (de Gouw and Warneke, 2007).  $m/z$  46 can correspond to several compounds: it was mostly identified as  $\text{CH}_3\text{NO}$  and  $\text{C}_2\text{H}_7\text{N}$ , respectively formamide and dimethylamine, both compounds emitted by agricultural activities (Yuan et al., 2017a; Kammer et al., 2019). However, a few studies reported this mass as  $\text{NO}_2^+$ , that would correspond notably to peroxyacetyl nitrate (PAN) fragmentations (Yuan et al., 2017b) or other organic nitrates (Aoki et al., 2007; Duncianu et al., 2017), but cannot be precisely quantify using  $\text{H}_3\text{O}^+$  ionization. In this study, we will refer to it as  $m/z$  46 (or  $m/z$  46).  $m/z$  47 corresponds to  $\text{C}_2\text{H}_6\text{O}$  (ethanol) and  $\text{CH}_2\text{O}_2$  (formic acid) and will therefore be referred to as their sum, although the sensitivity of ethanol is lower than that of formic acid. Their seasonal contribution can be found in Table 2, and shows that  $m/z$  47 is dominated by formic acid in spring and summer ( $> 90\%$ ), but in autumn and winter, ethanol contribution becomes significant. This is a similar trend to that of furan's and isoprene's contributions to  $m/z$  69.  $m/z$  57 is usually attributed to propenal ( $\text{C}_3\text{H}_4\text{O}$ ) (Knighton et al., 2007;

30

Languille et al., 2020), but there are interferences from  $C_4H_8$ : butenes or other hydrocarbons' fragmentations, that cannot be precisely quantified but seem to be dominant in our study (Table 2).  $m/z$  58 was assigned to allylamine, a compound emitted by agricultural activities (Kammer et al., 2019).  $m/z$  59 could be correspond to  $C_3H_6O$  (acetone + propanal),  $C_4H_{10}$  (butane) and  $C_2H_2O_2$  (glyoxal); PTR-ToF-MS measurements showed that in all seasons,  $C_3H_6O$  is dominant by about 97%. de Gouw and Warneke (2007) indicated that propanal is also negligible and  $m/z$  59 can be regarded as acetone only.  $m/z$  60 was assigned to trimethylamine, which is mostly emitted by agricultural activities (Kammer et al., 2019).  $m/z$  61 is attributed to acetic acid, an agricultural and biogenic compound.  $m/z$  63 was assigned to dimethylsulfide, emitted by phytoplanktonic activities in the oceans.  $m/z$  69 was assigned to  $C_4H_4O$ : furan and  $C_5H_8$ : isoprene and fragments of methylbutenol (MBO), but PTR-ToF-MS measurements showed that MBO is negligible (see discussion of  $m/z$  87). Furan is emitted by biomass-burning activities and has highest contributions in autumn and winter (47-67% of  $m/z$  69, Table 2); while in spring and summer,  $m/z$  69 can be almost exclusively attributed to isoprene (94-96%, Table 2), due to its important biogenic source, although it can also be emitted by anthropogenic sources (Borbon et al., 2001; Wagner and Kuttler, 2014; Panopoulou, 2020).  $m/z$  71 was mainly (by about 85%) attributed to  $C_4H_6O$ , the sum of methyl vinyl ketone (MVK), methacrolein (MACR), ISOPOOH, and crotonaldehyde. ISOPOOH are formed from isoprene oxidation under low  $NO_x$  conditions (Surratt et al., 2010; Budisulistiorini et al., 2013), and so are expected to be low in a suburban area. In summer, MVK + MACR would be dominant as they are the main isoprene oxidation products, and crotonaldehyde might dominate  $m/z$  71 in winter, due to its wood burning source (Lipari et al., 1984; Languille et al., 2020). Due to its overall higher level in summer, this  $m/z$  will be considered as MVK + MACR.  $m/z$  73 was mainly attributed to methyl ethyl ketone (MEK) in ambient air (Yuan et al., 2017b).  $m/z$  75 was identified as  $C_3H_6O_2$  (methylacetate, hydroxyacetone, propanoic acid); methylacetate would be a biomass burning compound (Bruns et al., 2017), while hydroxyacetone and propanoic acid are of biogenic origins (Yuan et al., 2017b). It is not possible to separate these compounds because they are isomers, but methylacetate is expected to be the dominant VOC in winter and hydroxyacetone + propanoic acid to be dominant in summer.  $m/z$  79 was assigned to benzene ( $C_6H_6$ ).  $m/z$  81 was assigned to fragments of monoterpenes (mostly) and of PAHs.  $m/z$  83 was identified as methylfuran ( $C_5H_6O$ ), that can be found in biomass burning plumes (Bruns et al., 2016), and as a minor oxidation product of isoprene (Kroll et al., 2006; and references therein). This mass was also identified as  $C_6H_{10}$ , fragments of hydrocarbons (HC) from gasoline and diesel cars (Gueneron et al., 2015). In winter and autumn, methylfuran is dominant (Table 2) while  $C_6H_{10}$  is significant in spring and summer.  $m/z$  85 was mainly assigned to methylbutenone ( $C_5H_8O$ ), identified as a biomass burning compound, by (Bruns et al., 2017) and as a biogenic compound by Kroll et al. (2006).  $m/z$  87 was assigned to  $C_4H_6O_2$  (butanedione + methacrylic acid) and  $C_5H_{10}O$  (methylbutenol, MBO). Butanedione was found in biomass burning plumes (Bruns et al., 2017), methacrylic acid was identified as an isoprene oxidation product (Williams et al., 2001; Nguyen, 2012) and MBO was shown to be emitted by biogenic sources (Holzinger et al, 2005; Kim et al., 2010). PTR-ToF-MS measurements showed that  $C_4H_6O_2$  is dominant (> 80%), thus butanedione would be the main compound in winter and methacrylic acid (MAA) in summer.  $m/z$  93 was assigned to toluene ( $C_7H_8$ ), a major traffic compound.  $m/z$  97 can be attributed to several compounds such as  $C_2$ -substituted furans and furaldehydes (Yuan et al.,

2017b), but Bruns et al. (2017) reported this mass as furfural ( $C_5H_4O_2$ ) in biomass-burning influenced regions, and Languille  
65 et al. (2020) also defined  $m/z$  97 as furfural in winter at SIRT.  $m/z$  99 was identified as  $C_5H_6O_2$  (furfuryl alcohol) by Stockwell  
et al. (2015), and as  $C_4H_2O_3$  (furanone) by Bruns et al. (2017), both present in aged biomass burning plumes. In this study,  
both compounds are present so this mass will be regarded as their sum.  $m/z$  107 was assigned to  $C_8H_{10}$  ( $C_8$ -aromatics: xylenes,  
ethylbenzene) and  $C_7H_6O$  (benzaldehyde);  $C_8$ -aromatics are dominant by about 80% (Table 2), and thus this mass will be  
regarded as mainly  $C_8$ -aromatics.  $m/z$  111 was identified as benzenediol by Bruns et al. (2016) as a biomass burning compound.  
70  $m/z$  121 was assigned to  $C_9$ -aromatics (trimethylbenzenes), mainly emitted by traffic.  $m/z$  137 was assigned to monoterpenes,  
for which the main source is supposed to be biogenic, although anthropogenic sources, traffic and wood burning, were  
identified recently (Panopoulou et al., 2020).  $m/z$  139 was assigned to nopinone, an oxidation product of monoterpenes.  $m/z$   
147 was assigned to dichlorobenzene.  $m/z$  151 is identified as  $C_9H_{10}O_2$ , pinonaldehyde, an alpha-pinene ozonolysis product.  
Pinonaldehyde is measured at  $m/z$  169 and at  $m/z$  151, which corresponds to pinonaldehyde- $H_2O$ .

75

## Section 2: Tables and Figures

**Table S1: Instrument parameters throughout the two-year measurement period**

| Name                             | Symbol                   | Value (unit)                         |
|----------------------------------|--------------------------|--------------------------------------|
| Pressure in the drift chamber    | $P_{\text{drift}}$       | 2.2 mbar                             |
| Pressure in the detector         | $P_{\text{detect}}$      | $1.7\text{--}3.3 \cdot 10^{-5}$ mbar |
| Controlled pressure              | $P_{\text{control}}$     | 352–484 mbar                         |
| Temperature in the drift chamber | $T_{\text{drift}}$       | 60 °C                                |
| Temperature in the inlet tube    | $T_{\text{inlet}}$       | 60 °C                                |
| Voltage in the drift chamber     | $U_{\text{drift}}$       | 600 V                                |
| Water flow                       | $F_{\text{H}_2\text{O}}$ | 5–8 mL·min <sup>-1</sup>             |
| Voltage                          | $U_{\text{SO}}$          | 90–130 V                             |
| Voltage                          | $U_{\text{S}}$           | 80–120 V                             |
| Source intensity                 | $I_{\text{hc}}$          | 3–6 mA                               |
| Voltage in the SEM               | $U_{\text{SEM}}$         | 2000–3500 V                          |
| Drift tube length                | $L$                      | 9.2 cm                               |
| Collision energy                 | E/N                      | 134.4 Td                             |

80 **Table S2: Standard canisters used for calibration throughout the two-year measurement period**

| Start     | End        | Reference of standard   | Composition                                                                                                                                                       | VMR     |
|-----------|------------|-------------------------|-------------------------------------------------------------------------------------------------------------------------------------------------------------------|---------|
| 1/18/2020 | 9/10/2020  | R0904, Ionicon Analytik | Methanol, Acetonitrile, Acetaldehyde, Acrolein, Acetone, Isoprene, Crotonaldehyde, 2-Butanone, Benzene, Toluene, o-Xylene, $\alpha$ -pinene, 1,2-Dichlorobenzene  | 1 ppm   |
| 9/10/2020 | 6/15/2021  | L5387, Ionicon Analytik | Methanol, Acetonitrile, Acetone, Isoprene, Benzene, Toluene, Xylenes, Trimethylbenzene, 1,2-Dichlorobenzene                                                       | 100 ppb |
| 9/1/2021  | 12/31/2021 | D155286, SIAD           | Methanol, Acetonitrile, Acetaldehyde, Acrolein, Acetone, MEK, Benzene, Toluene, o-Xylene, $\alpha$ -pinene, 1,2-Dichlorobenzene                                   | 1 ppm   |
| 5/23/2022 | current    | NPL                     | Methanol, Acetonitrile, Acetaldehyde, Acetone, Isoprene, Dimethylsulfide, 3-Buten-2-one, 2-Butanone, Benzene, Toluene, m-Xylene, 1,2,4-Trimethylbenzene, 3-Carene | 1 ppm   |

**Table S3: Sensitivity coefficients (ncps/ppb) throughout the 2020-2021 period**

| <b>Time</b> | <b>SEM voltage (V)</b> | <b>Standard</b> | <b>mz_33 Methanol</b> | <b>mz_42 Acetonitrile</b> | <b>mz_45 Acetaldehyde</b> | <b>mz_57 Propenal</b> | <b>mz_59 Acetone</b> | <b>mz_69 Isoprene</b> |
|-------------|------------------------|-----------------|-----------------------|---------------------------|---------------------------|-----------------------|----------------------|-----------------------|
| 1/15/2020   | 2975                   | R0904           | 10.71                 | 19.52                     | 18.97                     | 17.67                 | 21.22                | 6.55                  |
| 1/21/2020   | 2975                   | R0904           | 9.43                  | 18.18                     | 17.63                     | 15.81                 | 19.12                | 5.72                  |
| 2/25/2020   | 2975                   | R0904           | 9.63                  | 16.23                     | 15.91                     | 13.83                 | 16.47                | 4.75                  |
| 6/11/2020   | 3100                   | R0904           | 11.73                 | 20.13                     | 20.09                     | 18.80                 | 21.90                | 7.29                  |
| 7/1/2020    | 3100                   | R0904           | 11.32                 | 20.45                     | 21.37                     | 18.14                 | 22.72                | 7.24                  |
| 8/7/2020    | 3100                   | R0904           | 11.97                 | 19.64                     | 19.02                     | 17.97                 | 20.69                | 6.87                  |
| 9/10/2020   | 3050                   | R0904           | 11.41                 | 17.01                     | 16.37                     | 14.04                 | 16.86                | 4.73                  |
| 10/9/2020   | 3050                   | L5387           | 10.04                 | 17.89                     |                           |                       | 17.15                | 4.14                  |
| 11/9/2020   | 3050                   | L5387           | 7.10                  | 17.38                     |                           |                       | 16.91                | 4.07                  |
| 12/11/2020  | 3050                   | L5387           | 8.28                  | 16.98                     |                           |                       | 16.96                | 3.62                  |
| 1/15/2021   | 3200                   | L5387           | 8.62                  | 21.14                     |                           |                       | 21.32                | 5.38                  |
| 1/28/2021   | 3200                   | L5387           | 9.95                  | 21.87                     |                           |                       | 23.14                | 6.10                  |
| 2/25/2021   | 3250                   | L5387           | 9.43                  | 22.10                     |                           |                       | 25.41                | 6.76                  |
| 4/6/2021    | 3375                   | L5387           | 10.93                 | 24.01                     |                           |                       | 26.82                | 7.25                  |
| 4/26/2021   | 2300                   | L5387           | 9.21                  | 18.87                     |                           |                       | 19.19                | 5.52                  |
| 5/27/2021   | 2350                   | L5387           | 8.91                  | 19.53                     |                           |                       | 20.04                | 5.06                  |
| 8/16/2021   | 2350                   | D155286         | 8.35                  | 14.37                     | 18.72                     | 16.30                 | 21.71                | 6.46                  |
| 9/10/2021   | 2350                   | D155286         | 7.87                  | 10.20                     | 12.66                     | 8.58                  | 12.99                | 3.82                  |
| 9/20/2021   | 2350                   | D155286         | 7.17                  | 14.19                     | 12.72                     | 8.59                  | 12.12                | 3.66                  |
| 10/25/2021  | 2375                   | D155286         | 5.92                  | 10.37                     | 12.05                     | 4.15                  | 10.98                | 3.31                  |
| 11/16/2021  | 2425                   | D155286         | 5.43                  | 9.25                      | 11.48                     | 7.99                  | 10.57                | 2.64                  |
| 11/16/2021  | 2425                   | D155286         | 5.72                  | 9.50                      | 11.85                     | 8.29                  | 10.71                | 2.57                  |
| 12/15/2021  | 2450                   | D155286         | 6.20                  | 10.66                     | 12.25                     | 8.93                  | 11.53                | 2.84                  |

| <b>Time</b> | <b>SEM voltage (V)</b> | <b>Standard</b> | <b>mz_73 MEK</b> | <b>mz_79 Benzene</b> | <b>mz_93 Toluene</b> | <b>mz_107 C8-Aromatics</b> | <b>mz_137 Monoterpenes</b> | <b>mz_147 Dichlorobenzene</b> |
|-------------|------------------------|-----------------|------------------|----------------------|----------------------|----------------------------|----------------------------|-------------------------------|
| 1/15/2020   | 2975                   | R0904           | 18.63            | 8.28                 | 7.95                 | 7.06                       | 1.34                       | 1.65                          |
| 1/21/2020   | 2975                   | R0904           | 16.39            | 7.77                 | 7.05                 | 6.03                       | 1.15                       | 1.36                          |
| 2/25/2020   | 2975                   | R0904           | 13.54            | 6.12                 | 5.45                 | 4.55                       | 0.84                       | 0.90                          |
| 6/11/2020   | 3100                   | R0904           | 18.56            | 9.48                 | 9.20                 | 8.33                       | 1.69                       | 1.94                          |
| 7/1/2020    | 3100                   | R0904           | 19.75            | 8.80                 | 8.85                 | 8.01                       | 1.66                       | 1.81                          |
| 8/7/2020    | 3100                   | R0904           | 17.66            | 8.37                 | 8.03                 | 7.08                       | 1.39                       | 1.56                          |
| 9/10/2020   | 3050                   | R0904           | 13.76            | 5.95                 | 5.43                 | 4.47                       | 0.81                       | 0.94                          |
| 10/9/2020   | 3050                   | L5387           |                  | 5.31                 | 4.70                 | 3.90                       |                            | 0.84                          |

|            |      |         |       |       |       |       |      |      |
|------------|------|---------|-------|-------|-------|-------|------|------|
| 11/9/2020  | 3050 | L5387   |       | 4.99  | 4.24  | 3.45  |      | 0.80 |
| 12/11/2020 | 3050 | L5387   |       | 4.52  | 4.70  | 3.33  |      | 0.68 |
| 1/15/2021  | 3200 | L5387   |       | 7.68  | 6.89  | 6.15  |      | 1.52 |
| 1/28/2021  | 3200 | L5387   |       | 8.23  | 8.07  | 6.92  |      | 1.75 |
| 2/25/2021  | 3250 | L5387   |       | 9.72  | 9.53  | 8.57  |      | 2.08 |
| 4/6/2021   | 3375 | L5387   |       | 12.23 | 11.92 | 10.81 |      | 3.26 |
| 4/26/2021  | 2300 | L5387   |       | 6.81  | 6.81  | 4.99  |      | 1.42 |
| 5/27/2021  | 2350 | L5387   |       | 7.28  | 6.17  | 4.79  |      | 1.32 |
| 8/16/2021  | 2350 | D155286 | 18.65 | 9.11  | 8.82  | 7.76  | 1.50 | 1.75 |
| 9/10/2021  | 2350 | D155286 | 10.57 | 4.35  | 3.64  | 2.62  | 0.44 | 0.57 |
| 9/20/2021  | 2350 | D155286 | 9.79  | 4.20  | 3.31  | 2.37  | 0.39 | 0.45 |
| 10/25/2021 | 2375 | D155286 | 8.63  | 4.03  | 3.01  | 2.10  |      | 0.37 |
| 11/16/2021 | 2425 | D155286 | 7.72  | 3.18  | 2.45  | 1.66  |      | 0.29 |
| 11/16/2021 | 2425 | D155286 | 7.64  | 3.37  | 2.53  | 1.83  |      | 0.29 |
| 12/15/2021 | 2450 | D155286 | 8.57  | 3.59  | 2.79  | 1.97  | 0.29 | 0.39 |

**Table S4: Sensitivities (ncps/ppb) obtained for calibrations at various relative humidities**

| Relative humidity | m/z 33 | m/z 42 | m/z 45 | m/z 59  | m/z 69  | m/z 71  |
|-------------------|--------|--------|--------|---------|---------|---------|
| 30 %              | 8.1    | 17.0   | 20.5   | 22.4    | 8.6     | 23.3    |
| 60 %              | 8.1    | 19.0   | 18.2   | 22.1    | 7.9     | 21.0    |
| 90 %              | 8.7    | 19.6   | 18.8   | 22.7    | 8.0     | 21.9    |
| CV (%)            | 5      | 7      | 6      | 1       | 5       | 5       |
| Relative humidity | m/z 73 | m/z 79 | m/z 93 | m/z 107 | m/z 121 | m/z 137 |
| 30 %              | 21.9   | 13.6   | 14.4   | 13.6    | 11.1    | 4.1     |
| 60 %              | 22.2   | 13.3   | 14.4   | 13.4    | 10.7    | 4.1     |
| 90 %              | 22.4   | 13.2   | 14.2   | 13.3    | 10.8    | 4.2     |
| CV (%)            | 1      | 1      | 1      | 1       | 2       | 2       |

*CV = coefficient of variation*



**Table S5: Mean and standard deviation values for target bottle measurements**

| m/z                | m/z 33 | m/z 42 | m/z 45 | m/z 46 | m/z 57 | m/z 59 | m/z 60 | m/z 61 | m/z 69 | m/z 71 |
|--------------------|--------|--------|--------|--------|--------|--------|--------|--------|--------|--------|
| Mean (ppb)         | 3.22   | 0.25   | 23.68  | 1.04   | 1.53   | 16.58  | 0.86   | 0.53   | 1.82   | 0.57   |
| Standard deviation | 0.72   | 0.03   | 2.68   | 0.57   | 0.43   | 0.98   | 0.16   | 0.27   | 0.24   | 0.17   |

  

| m/z                | m/z 73 | m/z 79 | m/z 83 | m/z 85 | m/z 87 | m/z 93 | m/z 97 | m/z 107 | m/z 121 |
|--------------------|--------|--------|--------|--------|--------|--------|--------|---------|---------|
| Mean (ppb)         | 1.38   | 0.41   | 0.51   | 0.31   | 1.90   | 0.39   | 0.39   | 0.59    | 0.34    |
| Standard deviation | 0.18   | 0.05   | 0.16   | 0.16   | 0.32   | 0.05   | 0.16   | 0.10    | 0.15    |

90

**Table S6: Descriptive statistics obtained for 2020 and 2021. Values are in ppb.**

|                                  | Mean<br>2020 | Median<br>2020 | 25th<br>percentile<br>2020 | 75th<br>percentile<br>2020 | sigma<br>2020 | Mean<br>2021 | Median<br>2021 | 25th<br>percentile<br>2021 | 75th<br>percentile<br>2021 |
|----------------------------------|--------------|----------------|----------------------------|----------------------------|---------------|--------------|----------------|----------------------------|----------------------------|
| Methanol                         | 2.87         | 2.05           | 0.96                       | 3.81                       | 2.86          | 2.87         | 2.07           | 1.28                       | 3.46                       |
| Acetone                          | 1.06         | 0.83           | 0.48                       | 1.31                       | 0.85          | 0.93         | 0.70           | 0.45                       | 1.21                       |
| Acetic acid                      | 0.68         | 0.41           | 0.21                       | 0.83                       | 0.75          | 0.58         | 0.43           | 0.22                       | 0.80                       |
| Acetaldehyde                     | 0.58         | 0.42           | 0.26                       | 0.74                       | 0.50          | 0.61         | 0.50           | 0.31                       | 0.80                       |
| Ethanol + Formic acid            | 0.49         | 0.32           | 0.16                       | 0.60                       | 0.54          | 0.49         | 0.40           | 0.27                       | 0.63                       |
| MEK                              | 0.19         | 0.14           | 0.09                       | 0.24                       | 0.17          | 0.18         | 0.15           | 0.09                       | 0.23                       |
| Formaldehyde proxy               | 0.11         | 0.09           | 0.04                       | 0.17                       | 0.12          | 0.09         | 0.10           | 0.04                       | 0.16                       |
| C3H6O2                           | 0.12         | 0.07           | 0.04                       | 0.14                       | 0.12          | 0.10         | 0.08           | 0.05                       | 0.13                       |
| MVK+MACR                         | 0.13         | 0.06           | 0.03                       | 0.15                       | 0.19          | 0.06         | 0.04           | 0.02                       | 0.07                       |
| Butandione + MAA                 | 0.06         | 0.04           | -0.03                      | 0.11                       | 0.12          | 0.09         | 0.08           | 0.02                       | 0.14                       |
| Pinonaldehyde                    | 0.06         | 0.05           | 0.03                       | 0.10                       | 0.07          | 0.03         | 0.01           | 0.00                       | 0.04                       |
| Methylfuran + C6H10              | 0.06         | 0.04           | 0.02                       | 0.07                       | 0.06          | 0.05         | 0.04           | 0.03                       | 0.07                       |
| Furfural                         | 0.05         | 0.03           | 0.02                       | 0.06                       | 0.06          | 0.05         | 0.03           | 0.02                       | 0.06                       |
| Furandione + furfuryl<br>alcohol | 0.04         | 0.03           | 0.02                       | 0.05                       | 0.04          | 0.03         | 0.03           | 0.02                       | 0.05                       |
| Nopinone                         | 0.03         | 0.03           | 0.01                       | 0.05                       | 0.04          | 0.01         | 0.01           | 0.00                       | 0.02                       |
| Benzenediol                      | 0.03         | 0.03           | 0.01                       | 0.05                       | 0.04          | 0.03         | 0.02           | 0.01                       | 0.04                       |
| Methylbutenone                   | 0.03         | 0.02           | 0.01                       | 0.04                       | 0.03          | 0.03         | 0.02           | 0.01                       | 0.04                       |
| Toluene                          | 0.17         | 0.10           | 0.06                       | 0.19                       | 0.20          | 0.18         | 0.12           | 0.07                       | 0.22                       |
| Benzene                          | 0.13         | 0.10           | 0.05                       | 0.16                       | 0.13          | 0.15         | 0.13           | 0.09                       | 0.20                       |
| C8_Aromatics                     | 0.14         | 0.08           | 0.04                       | 0.16                       | 0.19          | 0.14         | 0.09           | 0.05                       | 0.18                       |
| C9_Aromatics                     | 0.08         | 0.06           | 0.03                       | 0.11                       | 0.10          | 0.09         | 0.06           | 0.04                       | 0.11                       |
| C4H8 + Propenal                  | 0.25         | 0.18           | 0.11                       | 0.31                       | 0.24          | 0.34         | 0.25           | 0.14                       | 0.45                       |
| Isoprene + Furan                 | 0.24         | 0.16           | 0.08                       | 0.29                       | 0.31          | 0.16         | 0.12           | 0.07                       | 0.19                       |
| Monoterpenes                     | 0.10         | 0.07           | 0.04                       | 0.13                       | 0.15          | 0.07         | 0.05           | 0.03                       | 0.09                       |
| Monoterpenes frag                | 0.05         | 0.04           | 0.03                       | 0.06                       | 0.07          | 0.06         | 0.04           | 0.03                       | 0.06                       |
| m46                              | 0.53         | 0.18           | 0.03                       | 0.57                       | 1.02          | 0.49         | 0.20           | 0.04                       | 0.55                       |
| Acetonitrile                     | 0.08         | 0.07           | 0.05                       | 0.10                       | 0.04          | 0.09         | 0.07           | 0.05                       | 0.12                       |
| Trimethylamine                   | 0.07         | 0.06           | 0.04                       | 0.08                       | 0.05          | 0.06         | 0.05           | 0.03                       | 0.08                       |
| Allylamine                       | 0.02         | 0.02           | 0.01                       | 0.02                       | 0.01          | 0.02         | 0.02           | 0.01                       | 0.02                       |
| DMS                              | 0.02         | 0.02           | 0.00                       | 0.03                       | 0.03          | 0.02         | 0.02           | 0.01                       | 0.03                       |
| Dichlorobenzene                  | 0.03         | 0.02           | 0.01                       | 0.05                       | 0.04          | 0.01         | 0.01           | 0.00                       | 0.02                       |
| TOTAL                            | 19.11        | 14.52          | 8.46                       | 24.09                      | 15.91         | 17.65        | 14.49          | 9.33                       | 23.31                      |

**Table S7: Percentage of occurrence of air mass clusters per season**

| %            | DJF | MAM | JJA | SON |
|--------------|-----|-----|-----|-----|
| Continental  | 21  | 37  | 18  | 23  |
| Anticyclonic | 26  | 20  | 24  | 31  |
| Oceanic 1    | 45  | 13  | 23  | 19  |
| Oceanic 2    | 26  | 21  | 29  | 24  |
| North 1      | 13  | 35  | 28  | 24  |
| North 2      | 16  | 40  | 17  | 27  |

**Table S8: Mean VOC levels (ppb) per cluster**

|                                                    | Continental | Anticyclonic | Oceanic 1 | Oceanic 2 | North 1 | North 2 |
|----------------------------------------------------|-------------|--------------|-----------|-----------|---------|---------|
| Formaldehyde proxy                                 | 0.17        | 0.14         | 0.03      | 0.07      | 0.14    | 0.09    |
| Methanol                                           | 4.57        | 3.98         | 1.64      | 2.02      | 3.17    | 1.70    |
| Acetonitrile                                       | 0.12        | 0.10         | 0.07      | 0.07      | 0.10    | 0.07    |
| Acetaldehyde                                       | 1.05        | 0.76         | 0.29      | 0.39      | 0.74    | 0.47    |
| mz_46                                              | 1.48        | 0.57         | 0.05      | 0.18      | 0.83    | 0.50    |
| Ethanol + Formic acid                              | 0.87        | 0.59         | 0.24      | 0.34      | 0.63    | 0.38    |
| C <sub>4</sub> H <sub>8</sub> + Propenal           | 0.41        | 0.36         | 0.19      | 0.21      | 0.39    | 0.26    |
| Allylamine                                         | 0.02        | 0.02         | 0.01      | 0.01      | 0.02    | 0.02    |
| Acetone                                            | 1.64        | 1.31         | 0.62      | 0.71      | 1.15    | 0.63    |
| Trimethylamine                                     | 0.10        | 0.09         | 0.04      | 0.05      | 0.07    | 0.04    |
| Acetic acid                                        | 1.25        | 0.83         | 0.25      | 0.39      | 0.78    | 0.49    |
| DMS                                                | 0.03        | 0.03         | 0.02      | 0.02      | 0.02    | 0.02    |
| Isoprene + Furan                                   | 0.28        | 0.30         | 0.14      | 0.14      | 0.20    | 0.11    |
| MVK + MACR                                         | 0.16        | 0.14         | 0.06      | 0.07      | 0.10    | 0.04    |
| MEK                                                | 0.32        | 0.25         | 0.10      | 0.12      | 0.23    | 0.15    |
| m75 – C <sub>3</sub> H <sub>6</sub> O <sub>2</sub> | 0.20        | 0.15         | 0.05      | 0.06      | 0.12    | 0.08    |
| Benzene                                            | 0.23        | 0.17         | 0.08      | 0.10      | 0.16    | 0.13    |
| Monoterpenes frag                                  | 0.07        | 0.07         | 0.04      | 0.04      | 0.07    | 0.04    |
| Methylfuran + C <sub>6</sub> H <sub>10</sub>       | 0.08        | 0.08         | 0.04      | 0.04      | 0.07    | 0.04    |
| Methylbutenone                                     | 0.04        | 0.04         | 0.02      | 0.02      | 0.03    | 0.02    |
| Butanedione + MAA                                  | 0.14        | 0.12         | 0.00      | 0.03      | 0.11    | 0.05    |
| Toluene                                            | 0.29        | 0.22         | 0.08      | 0.11      | 0.23    | 0.13    |
| Furfural                                           | 0.07        | 0.07         | 0.03      | 0.03      | 0.05    | 0.04    |
| Furandione + furfuryl alcohol                      | 0.06        | 0.05         | 0.02      | 0.03      | 0.04    | 0.03    |

|                 |      |      |      |      |      |      |
|-----------------|------|------|------|------|------|------|
| C8-Aromatics    | 0.24 | 0.18 | 0.06 | 0.09 | 0.19 | 0.10 |
| Benzenediol     | 0.04 | 0.04 | 0.02 | 0.02 | 0.04 | 0.03 |
| C9-Aromatics    | 0.12 | 0.10 | 0.05 | 0.06 | 0.13 | 0.07 |
| Monoterpenes    | 0.11 | 0.13 | 0.07 | 0.06 | 0.09 | 0.06 |
| Nopinone        | 0.03 | 0.03 | 0.02 | 0.01 | 0.02 | 0.02 |
| Dichlorobenzene | 0.02 | 0.02 | 0.01 | 0.02 | 0.02 | 0.02 |
| Pinonaldehyde   | 0.06 | 0.06 | 0.04 | 0.04 | 0.04 | 0.05 |

100

**Table S9: Correlations of VOCs with external tracers in winter**

| TRAFFIC WINTERS       | R <sup>2</sup> | WOOD BURNING WINTERS  | R <sup>2</sup> | MONOTERPENES WINTERS  | R <sup>2</sup> |
|-----------------------|----------------|-----------------------|----------------|-----------------------|----------------|
| m93xBC <sub>ff</sub>  | 0.72           | m83xBC <sub>wb</sub>  | 0.88           | m137xm97              | 0.23           |
| m107xBC <sub>ff</sub> | 0.80           | m85xBC <sub>wb</sub>  | 0.83           | m137xBC <sub>ff</sub> | 0.30           |
| m121xBC <sub>ff</sub> | 0.77           | m87xBC <sub>wb</sub>  | 0.53           | m137xNO <sub>2</sub>  | 0.23           |
| m93xNO <sub>2</sub>   | 0.65           | m97xBC <sub>wb</sub>  | 0.75           | m137xm93              | 0.42           |
| m107xNO <sub>2</sub>  | 0.64           | m99xBC <sub>wb</sub>  | 0.74           | m137xm107             | 0.39           |
| m121xNO <sub>2</sub>  | 0.61           | m111xBC <sub>wb</sub> | 0.67           | m137xm121             | 0.37           |
| m93xm107              | 0.86           |                       |                | m81xm97               | 0.35           |
| m93xm121              | 0.85           |                       |                | m81xBC <sub>ff</sub>  | 0.43           |
| m107xm121             | 0.86           |                       |                | m81xNO <sub>2</sub>   | 0.37           |
|                       |                |                       |                | m81xm93               | 0.59           |
|                       |                |                       |                | m81xm107              | 0.52           |
|                       |                |                       |                | m81xm121              | 0.53           |

105

110

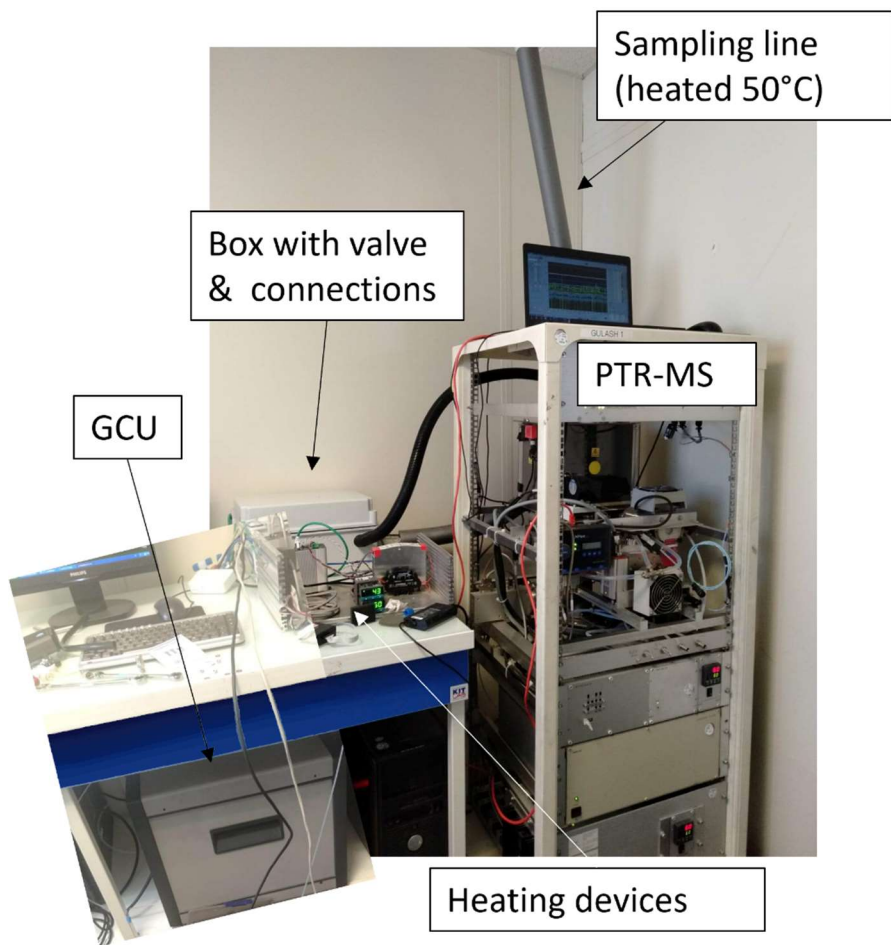

115

Figure S1: Experimental set-up of the PTR-MS for long-term VOC measurements at SIRTA.

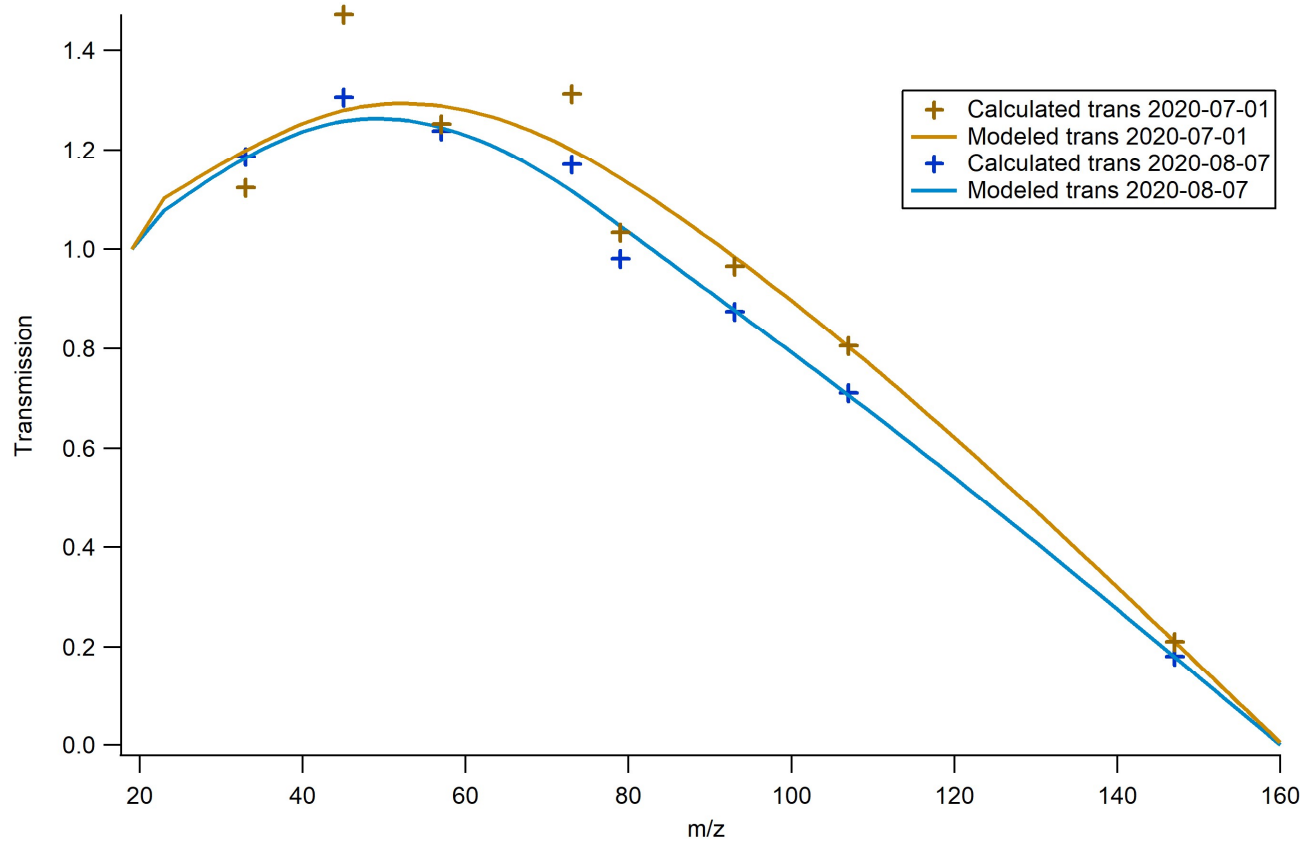

120 **Figure S2: Examples of transmission curves plotted by interpolation of calculated transmissions from the calibrations of 7/1/2020 and 8/7/2020.**

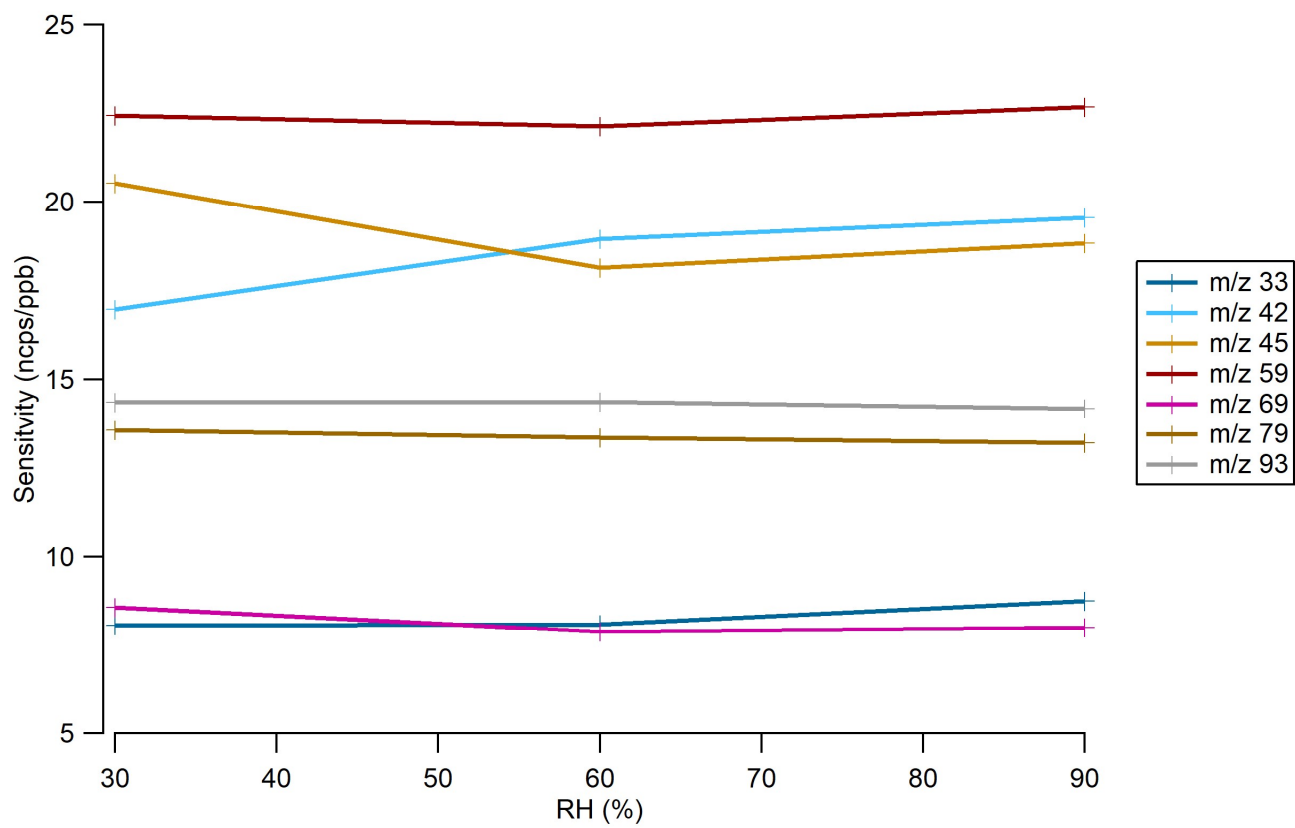

Figure S3: Sensitivities vs RH during the tests performed on August 4<sup>th</sup>, 2022

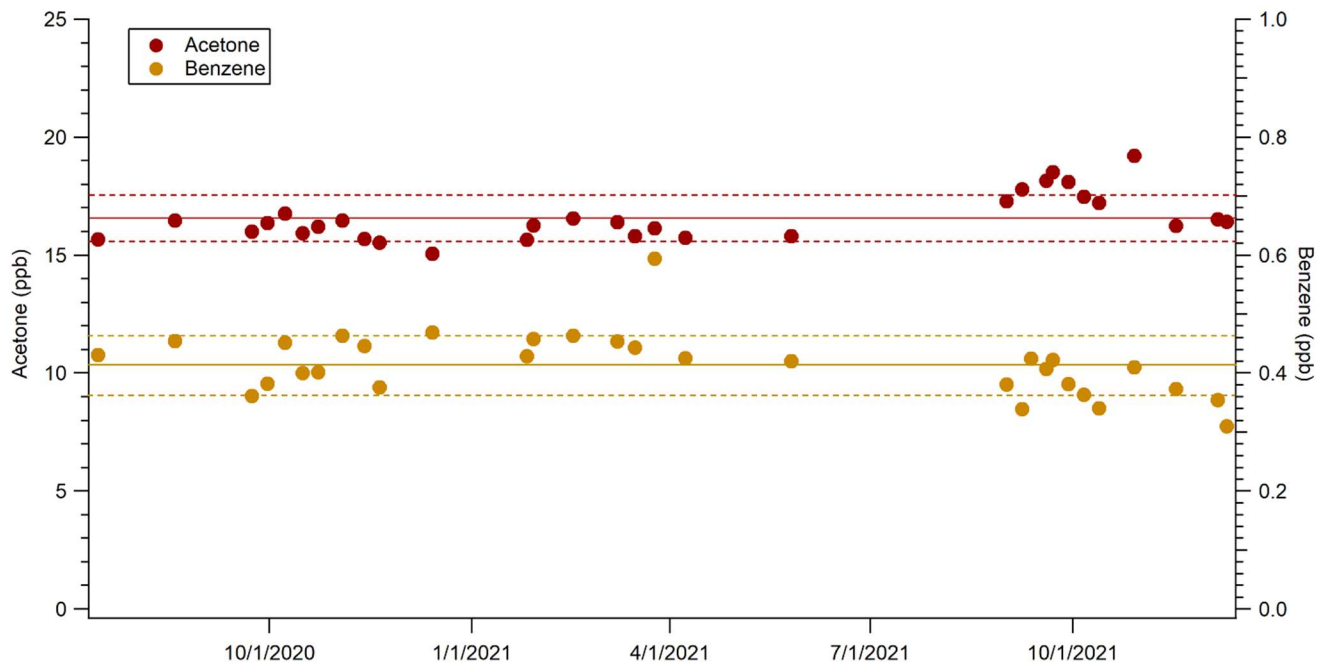

125

**Figure S4: Temporal evolution of acetone and benzene measurements from the target bottle. The lines represent the mean value while the dashed lines represent mean  $\pm$  standard deviation.**

Figure S4 shows the temporal evolution of the measurements of acetone and benzene from the target bottle. In 2020 and early 2021, these measurements show small fluctuations but are mainly stable; however, by the end of 2021 the VMR of benzene decreases, due to the lower sensitivity ( $< 5$  ncps/ppb). The PTR-MS underwent an important maintenance early 2022 that solved this issue (benzene sensitivity around 13 ncps/ppb).

130



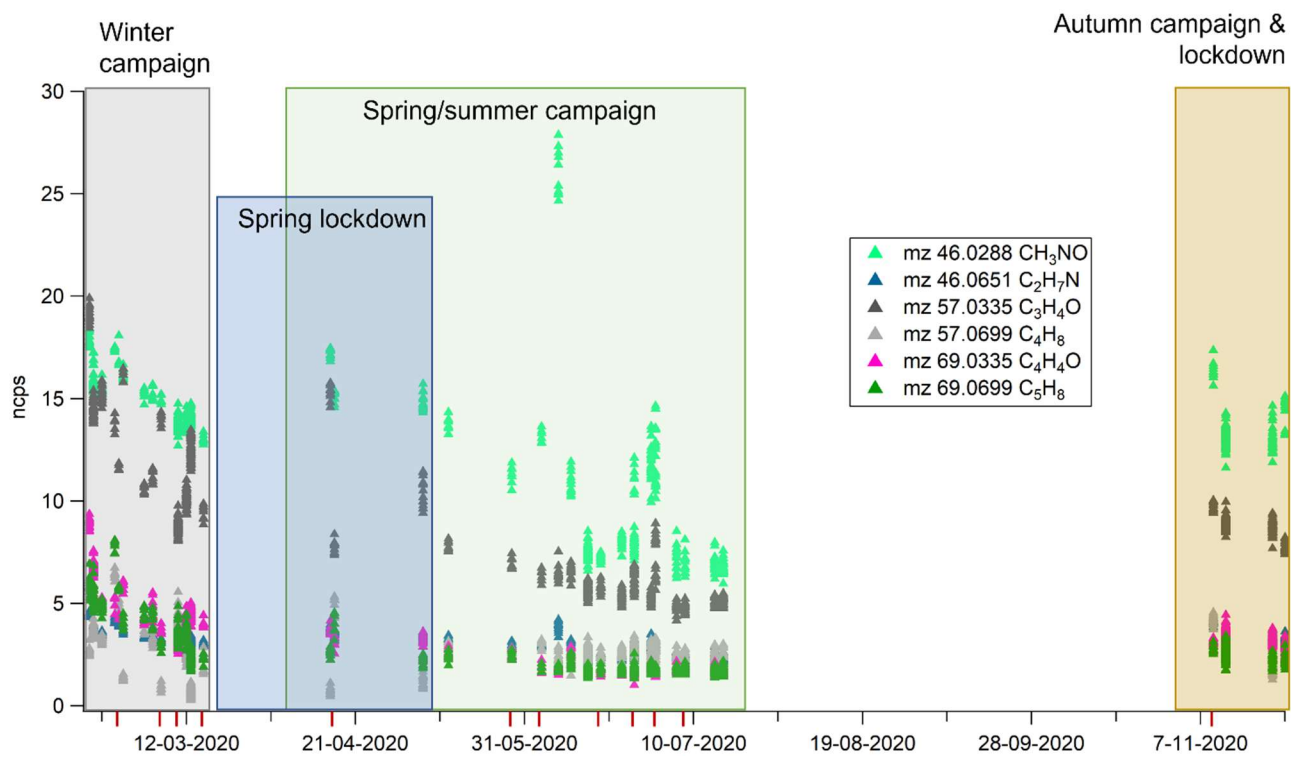

Figure S5: Blanks performed in 2020 for a selection of PTR-ToF-MS m/z. Calibrations are indicated by red sticks.

## Gas Canister VOC Standard Quality Assurance Certificate

Gas canister serial number: **R2845**

Ionicon guarantees the listed concentrations for a period of 6 months.  
Uncertainty is an estimate of a combination of the uncertainties of the original gravimetric preparation and subsequent analysis.

| Compound            | Volume mixing ratio / ppm | Uncertainty / % |
|---------------------|---------------------------|-----------------|
| Methanol            | 0.99                      | ±6              |
| Acetonitrile        | 0.99                      | ±6              |
| Acetaldehyde        | 0.95                      | ±5              |
| Ethanol             | 1.00                      | ±5              |
| Acrolein            | 1.01                      | ±5              |
| Acetone             | 0.98                      | ±5              |
| Isoprene            | 0.95                      | ±5              |
| Crotonaldehyde      | 1.01                      | ±5              |
| 2-Butanone          | 0.99                      | ±5              |
| Benzene             | 0.99                      | ±5              |
| Toluene             | 0.99                      | ±6              |
| o-Xylene            | 1.02                      | ±6              |
| Chlorobenzene       | 1.01                      | ±5              |
| α-Pinene            | 1.01                      | ±5              |
| 1,2-Dichlorobenzene | 1.02                      | ±5              |

Gas canisters are filled at a gauge pressure of 2.8 - 3.8 bar and are leak tested for tightness prior to shipping. Should the canister arrive at a pressure lower than the above range, please contact Ionicon immediately; the canister may have developed a leak during transportation and should be returned to Ionicon for refilling.

Jürgen Dunkl  
Canister filled by



Signature

10 December 2018  
Date

Ionicon Stamp:

**IONICON ANALYTIK**  
Gesellschaft mbH  
**Eduard-Bodem-Gasse 3**  
**6020 Innsbruck, Austria**  
Tel.: +43 (0) 512 214 800  
Fax: +43 (0) 512 214 800-099  
office@ionicon.com  
www.IONICON.com

Figure S6: Certificate of the canister R2845 used for PTR-ToF-MS calibrations.

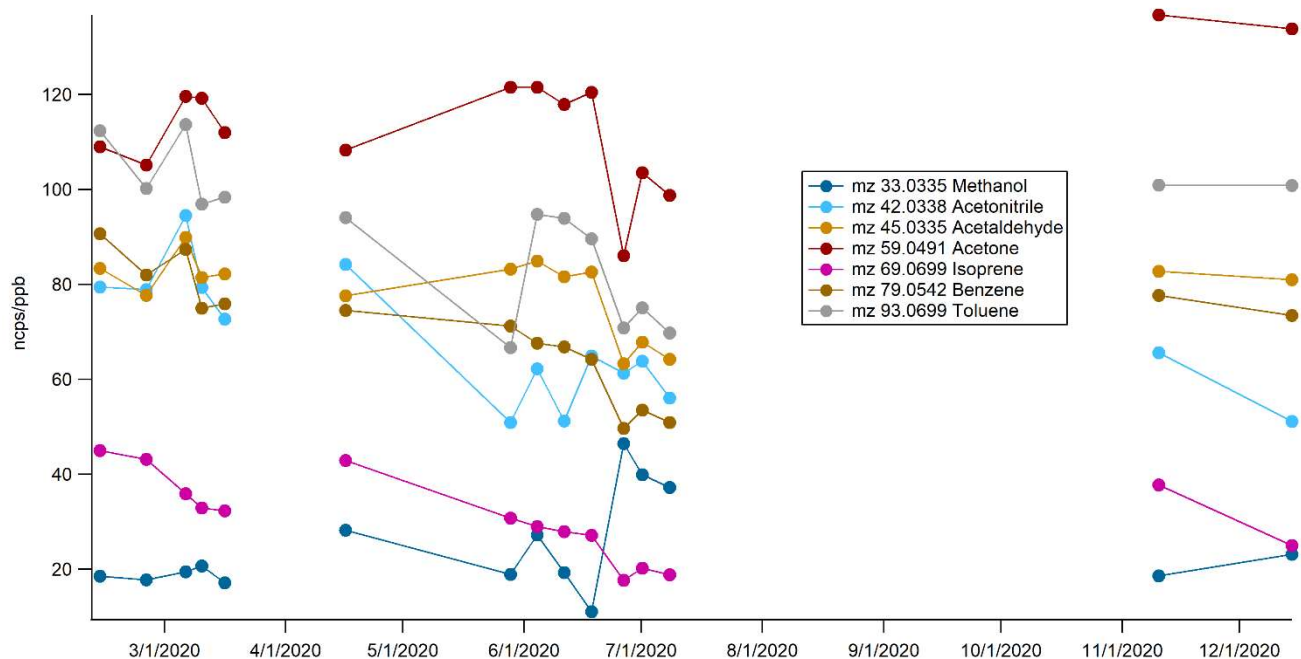

140 Figure S7: Temporal evolution of measured sensitivities for the PTR-ToF-MS, the different campaigns are separated by the discontinuity of the line.

Figure S7 presents the temporal evolution of the measured sensitivities for the PTR-ToF-MS. The long period with no sensitivity measured between April 16<sup>th</sup> and May 28<sup>th</sup> corresponds to the lockdown period. An additional calibration was performed on May 13<sup>th</sup>, but the sensitivities measured were very low due to little gas left in the canister, so this calibration was not considered.

145

year  
2020  
2021

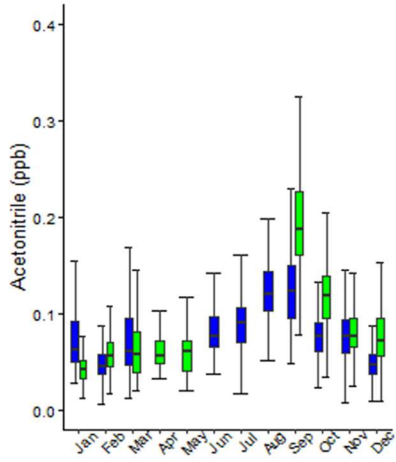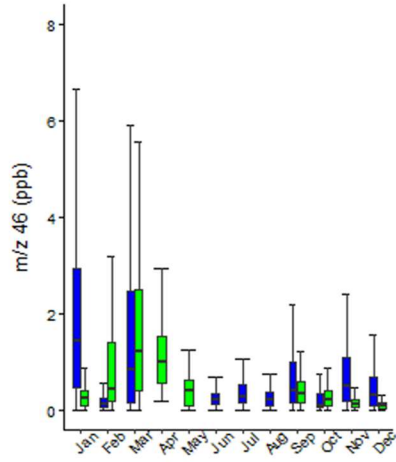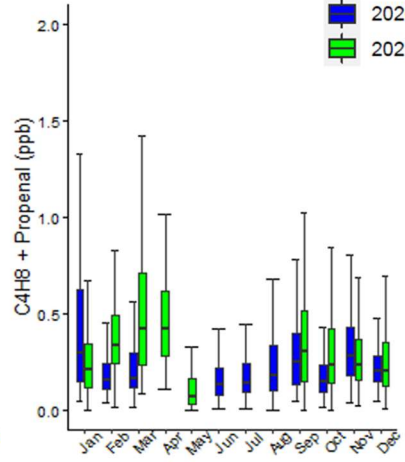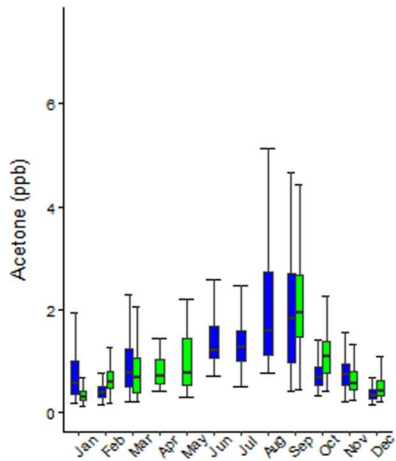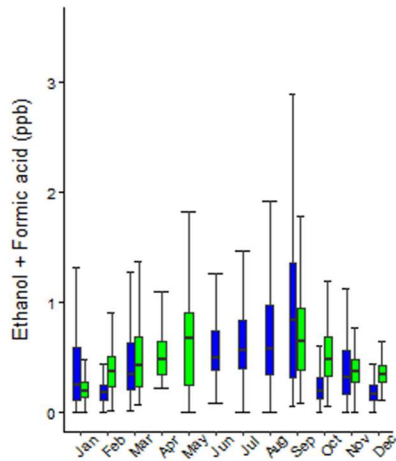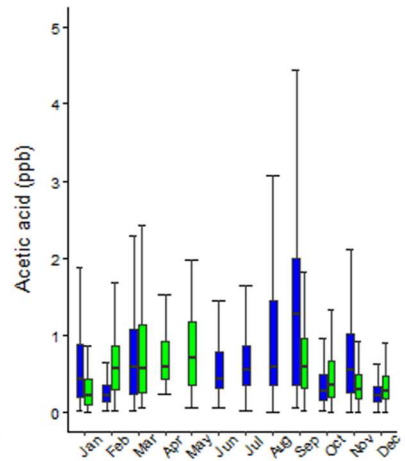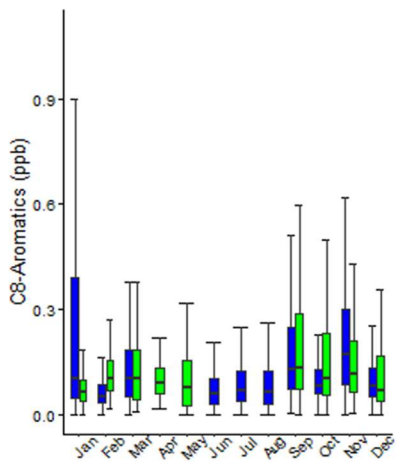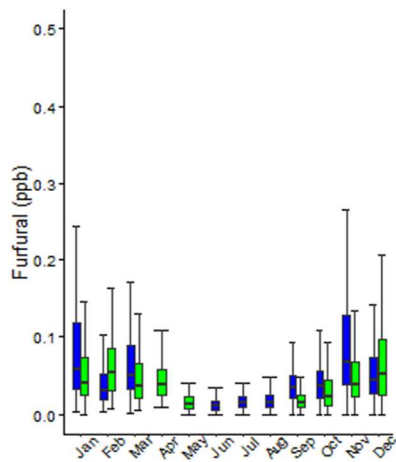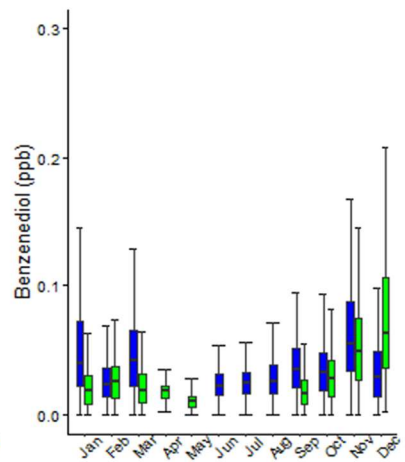

Figure S8: Monthly distribution of Furfural (m/z 97) for 2020 (blue) and 2021 (green). Boxes represent 25th and 75th percentiles, the line is the median. Whiskers represent 5th and 95th percentiles

150

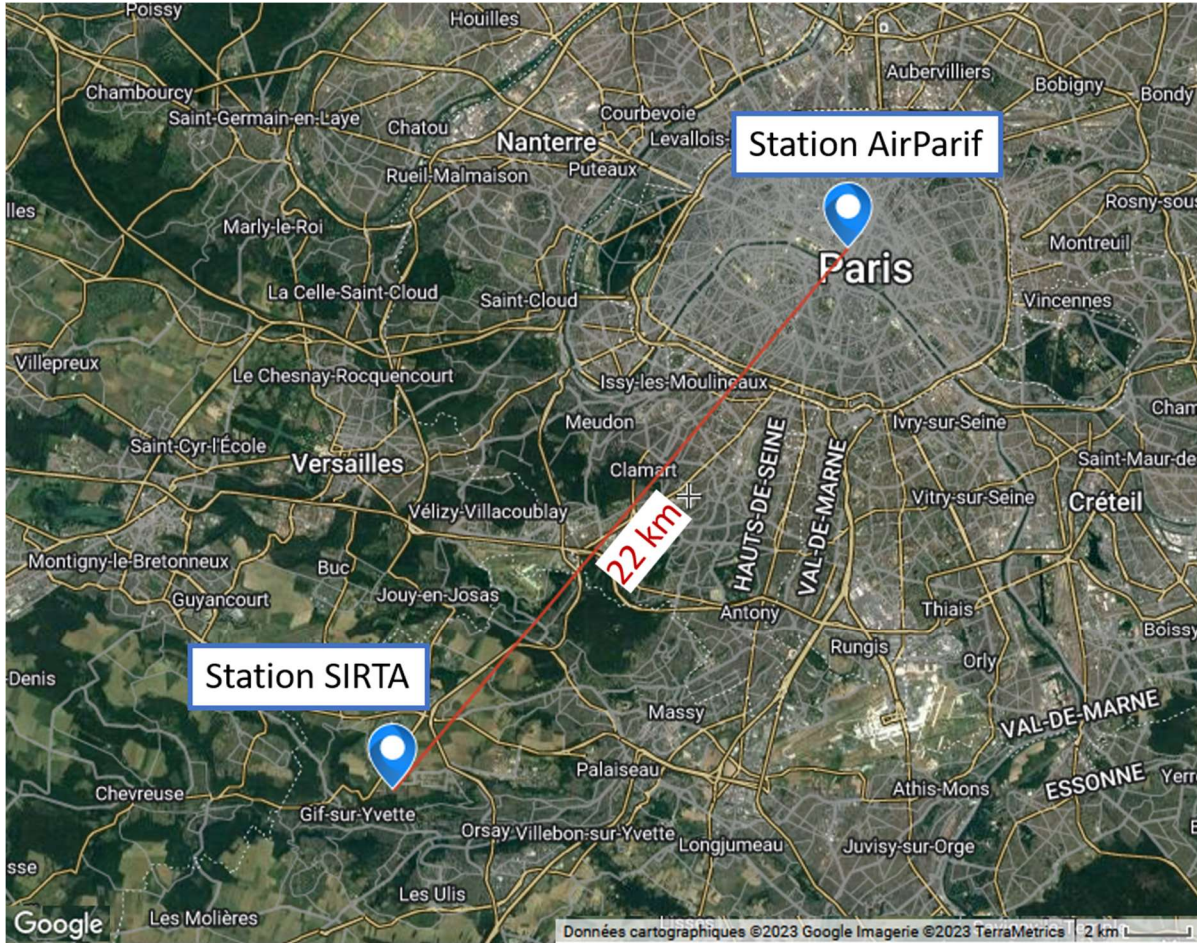

Figure S9: Map for the location of the Airparif station with respect to SIRT A

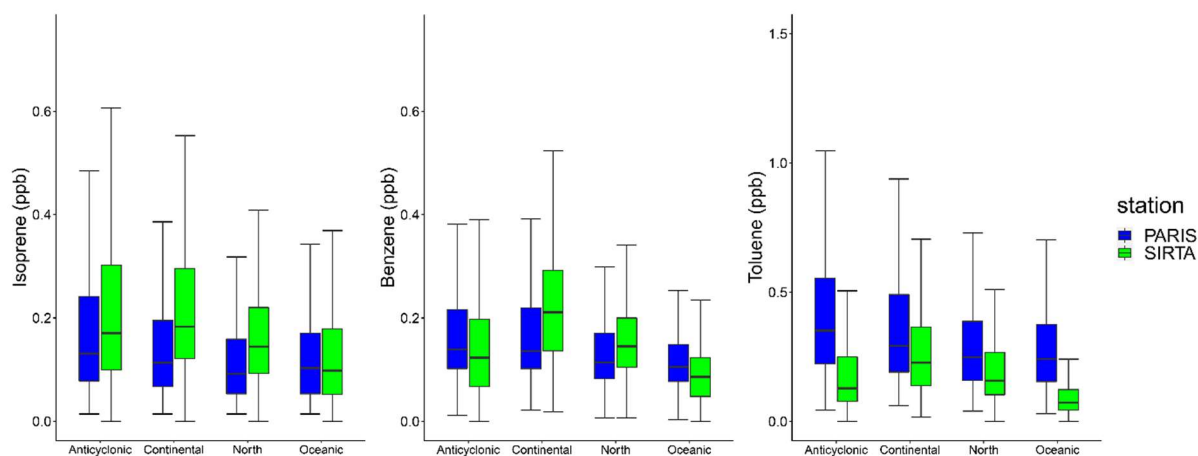

155 **Figure S10: Statistic distribution of measurements at SIRTA and Paris centre of isoprene, benzene, and toluene for the different air mass clusters. The line in the middle of the box is the median, lower and upper hinges are 25<sup>th</sup> and 75<sup>th</sup> percentiles, respectively. Lower and upper whiskers are lower hinge - 1.5 IQR and upper hinge + 1.5 IQR, respectively.**

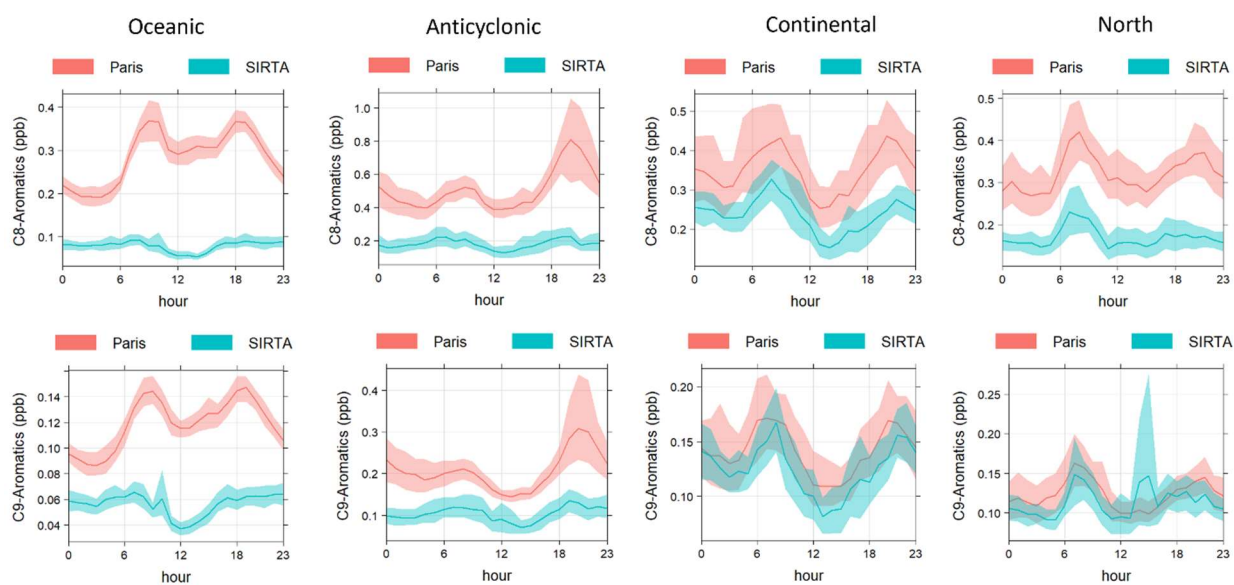

160 **Figure S11: Diel cycles of benzene, C8- and C9-aromatics at SIRTA and at Paris centre for oceanic, North, anticyclonic and continental air masses.**

## References

- Aoki, N., Inomata, S., and Tanimoto, H.: Detection of C1–C5 alkyl nitrates by proton transfer reaction time-of-flight mass spectrometry, *International Journal of Mass Spectrometry*, 263, 12–21, <https://doi.org/10.1016/j.ijms.2006.11.018>, 2007.
- 165 Borbon, A., Fontaine, H., Veillerot, M., Locoge, N., Galloo, J. C., and Guillermo, R.: An investigation into the traffic-related fraction of isoprene at an urban location, *Atmospheric Environment*, 35, 3749–3760, [https://doi.org/10.1016/S1352-2310\(01\)00170-4](https://doi.org/10.1016/S1352-2310(01)00170-4), 2001.
- Bruns, E. A., El Haddad, I., Slowik, J. G., Kilic, D., Klein, F., Baltensperger, U., and Prévôt, A. S. H.: Identification of significant precursor gases of secondary organic aerosols from residential wood combustion, *Sci Rep*, 6, 27881, <https://doi.org/10.1038/srep27881>, 2016.
- 170 Bruns, E. A., Slowik, J. G., El Haddad, I., Kilic, D., Klein, F., Dommen, J., Temime-Roussel, B., Marchand, N., Baltensperger, U., and Prévôt, A. S. H.: Characterization of gas-phase organics using proton transfer reaction time-of-flight mass spectrometry: fresh and aged residential wood combustion emissions, *Atmos. Chem. Phys.*, 17, 705–720, <https://doi.org/10.5194/acp-17-705-2017>, 2017.
- 175 Budisulistiorini, S. H., Canagaratna, M. R., Croteau, P. L., Marth, W. J., Baumann, K., Edgerton, E. S., Shaw, S. L., Knipping, E. M., Worsnop, D. R., Jayne, J. T., Gold, A., and Surratt, J. D.: Real-Time Continuous Characterization of Secondary Organic Aerosol Derived from Isoprene Epoxydiols in Downtown Atlanta, Georgia, Using the Aerodyne Aerosol Chemical Speciation Monitor, *Environ. Sci. Technol.*, 47, 5686–5694, <https://doi.org/10.1021/es400023n>, 2013.
- Duncanu, M., David, M., Kartigeyane, S., Cirtog, M., Doussin, J.-F., and Picquet-Varrault, B.: Measurement of alkyl and multifunctional organic nitrates by proton-transfer-reaction mass spectrometry, *Atmos. Meas. Tech.*, 10, 1445–1463, <https://doi.org/10.5194/amt-10-1445-2017>, 2017.
- 180 de Gouw, J. and Warneke, C.: Measurements of volatile organic compounds in the earth's atmosphere using proton-transfer-reaction mass spectrometry, *Mass Spectrom. Rev.*, 26, 223–257, <https://doi.org/10.1002/mas.20119>, 2007.
- Gueneron, M., Erickson, M. H., VanderSchelden, G. S., and Jobson, B. T.: PTR-MS fragmentation patterns of gasoline hydrocarbons, *International Journal of Mass Spectrometry*, 379, 97–109, <https://doi.org/10.1016/j.ijms.2015.01.001>, 2015.
- 185 Holzinger, R., Lee, A., Paw U, K T, and Goldstein, A. H.: Observations of oxidation products above a forest imply biogenic emissions of very reactive compounds, *Atmos. Chem. Phys.*, 9, 2005.
- Holzinger, R.: PTRwid: A new widget tool for processing PTR-TOF-MS data, *Atmos. Meas. Tech.*, 8, 3903–3922, <https://doi.org/10.5194/amt-8-3903-2015>, 2015.
- 190 Kammer, J., Décuq, C., Baisnée, D., Ciuraru, R., Lafouge, F., Buysse, P., Bsaibes, S., Henderson, B., Cristescu, S. M., Benabdallah, R., Chandra, V., Durand, B., Fanucci, O., Petit, J.-E., Truong, F., Bonnaire, N., Sarda-Estève, R., Gros, V., and Loubet, B.: Characterization of particulate and gaseous pollutants from a French dairy and sheep farm, *Science of The Total Environment*, 135598, <https://doi.org/10.1016/j.scitotenv.2019.135598>, 2019.
- 195 Kim, S., Karl, T., Guenther, A., Tyndall, G., Orlando, J., Harley, P., Rasmussen, R., and Apel, E.: Emissions and ambient distributions of Biogenic Volatile Organic Compounds (BVOC) in a ponderosa pine ecosystem: interpretation of PTR-MS mass spectra, *Atmos. Chem. Phys.*, 13, 2010.

- 200 Knighton, W. B., Herndon, S. C., Shorter, J. H., Miake-Lye, R. C., Zahniser, M. S., Akiyama, K., Shimono, A., Kitasaka, K., Shimajiri, H., and Sugihara, K.: Laboratory Evaluation of an Aldehyde Scrubber System Specifically for the Detection of Acrolein, *Journal of the Air & Waste Management Association*, 57, 1370–1378, <https://doi.org/10.3155/1047-3289.57.11.1370>, 2007.
- Kroll, J. H., Ng, N. L., Murphy, S. M., Flagan, R. C., and Seinfeld, J. H.: Secondary Organic Aerosol Formation from Isoprene Photooxidation, *Environ. Sci. Technol.*, 40, 1869–1877, <https://doi.org/10.1021/es0524301>, 2006.
- 205 Languille, B., Gros, V., Petit, J.-E., Honoré, C., Baudic, A., Perrussel, O., Foret, G., Michoud, V., Truong, F., Bonnaire, N., Sarda-Estève, R., Delmotte, M., Feron, A., Maisonneuve, F., Gaimoz, C., Formenti, P., Kotthaus, S., Haeffelin, M., and Favez, O.: Wood burning: A major source of Volatile Organic Compounds during wintertime in the Paris region, *Science of The Total Environment*, 711, 135055, <https://doi.org/10.1016/j.scitotenv.2019.135055>, 2020.
- Lindinger, W., Jordan, A., and Hansel, A.: Proton-transfer-reaction mass spectrometry (PTR-MS): on-line monitoring of volatile organic compounds at pptv levels, *Chem. Soc. Rev.*, 27, 347, <https://doi.org/10.1039/a827347z>, 1998.
- 210 Lipari, Frank., Dasch, J. M., and Scruggs, W. F.: Aldehyde emissions from wood-burning fireplaces, *Environ. Sci. Technol.*, 18, 326–330, <https://doi.org/10.1021/es00123a007>, 1984.
- Panopoulou, A.: Yearlong measurements of monoterpenes and isoprene in a Mediterranean city (Athens): Natural vs anthropogenic origin, *Atmospheric Environment*, 12, 2020.
- 215 Panopoulou, A., Liakakou, E., Sauvage, S., Gros, V., Locoge, N., Stavroulas, I., Bonsang, B., Gerasopoulos, E., and Mihalopoulos, N.: Yearlong measurements of monoterpenes and isoprene in a Mediterranean city (Athens): Natural vs anthropogenic origin, *Atmospheric Environment*, 243, 117803, <https://doi.org/10.1016/j.atmosenv.2020.117803>, 2020.
- Španěl, P., Wang, T., and Smith, D.: A selected ion flow tube, SIFT, study of the reactions of H<sub>3</sub>O<sup>+</sup>, NO<sup>+</sup> and O<sub>2</sub><sup>+</sup> ions with a series of diols, *International Journal of Mass Spectrometry*, 218, 227–236, [https://doi.org/10.1016/S1387-3806\(02\)00724-8](https://doi.org/10.1016/S1387-3806(02)00724-8), 2002.
- 220 Stockwell, C. E., Veres, P. R., Williams, J., and Yokelson, R. J.: Characterization of biomass burning emissions from cooking fires, peat, crop residue, and other fuels with high-resolution proton-transfer-reaction time-of-flight mass spectrometry, *Atmos. Chem. Phys.*, 15, 845–865, <https://doi.org/10.5194/acp-15-845-2015>, 2015.
- Surratt, J. D., Chan, A. W. H., Eddingsaas, N. C., Chan, M., Loza, C. L., Kwan, A. J., Hersey, S. P., Flagan, R. C., Wennberg, P. O., and Seinfeld, J. H.: Reactive intermediates revealed in secondary organic aerosol formation from isoprene, *Proceedings of the National Academy of Sciences*, 107, 6640–6645, <https://doi.org/10.1073/pnas.0911114107>, 2010.
- 225 Taipale, R., Ruuskanen, T. M., Rinne, J., Kajos, M. K., Hakola, H., Pohja, T., and Kulmala, M.: Technical Note: Quantitative long-term measurements of VOC concentrations by PTR-MS – measurement, calibration, and volume mixing ratio calculation methods, *Atmos. Chem. Phys.*, 18, 2008.
- Wagner, P. and Kuttler, W.: Biogenic and anthropogenic isoprene in the near-surface urban atmosphere — A case study in Essen, Germany, *Science of The Total Environment*, 475, 104–115, <https://doi.org/10.1016/j.scitotenv.2013.12.026>, 2014.
- 230 Williams, J., Pöschl, U., Crutzen, P. J., Hansel, A., Holzinger, R., Warneke, C., Lindinger, W., and Lelieveld, J.: An Atmospheric Chemistry Interpretation of Mass Scans Obtained from a Proton Transfer Mass Spectrometer Flown over the Tropical Rainforest of Surinam, 34, n.d.



- 235 Yuan, B., Coggon, M. M., Koss, A. R., Warneke, C., Eilerman, S., Peischl, J., Aikin, K. C., Ryerson, T. B., and de Gouw, J. A.: Emissions of volatile organic compounds (VOCs) from concentrated animal feeding operations (CAFOs): chemical compositions and separation of sources, *Atmos. Chem. Phys.*, 17, 4945–4956, <https://doi.org/10.5194/acp-17-4945-2017>, 2017a.
- Yuan, B., Koss, A. R., Warneke, C., Coggon, M., and Sekimoto, K.: Proton-Transfer-Reaction Mass Spectrometry: Applications in Atmospheric Sciences, *Chem. Rev.*, 43, 2017b.
- 240 Zhao, J. and Zhang, R.: Proton transfer reaction rate constants between hydronium ion ( $\text{H}_3\text{O}^+$ ) and volatile organic compounds, *Atmospheric Environment*, 38, 2177–2185, <https://doi.org/10.1016/j.atmosenv.2004.01.019>, 2004.
